# Supplementary material
Source: PubMed Central journal article supplement (PMC4316377)
Supplement: NIHMS657654-supplement-01.pdf [file NIHMS657654-supplement-01.pdf]

## Appendix

**Supplementary Table I.** Patient and hospital characteristics unweighted and weighted among HF patients

| Variable                                                              | Unweighted |        | Weighted |        |
|-----------------------------------------------------------------------|------------|--------|----------|--------|
|                                                                       | n/mean     | %/SE   | n/mean   | %/SE   |
| HF hospital stays                                                     | 189590     | 100.0% | 956745   | 100.0% |
| Age, mean (SE)                                                        | 73.0       | 0.2    | 73.1     | 0.2    |
| Age group, n (%)                                                      |            |        |          |        |
| 18-44                                                                 | 7688       | 4.1%   | 38293    | 4.0%   |
| 45-54                                                                 | 15776      | 8.3%   | 78816    | 8.2%   |
| 55-64                                                                 | 28037      | 14.8%  | 140524   | 14.7%  |
| 65-74                                                                 | 38676      | 20.4%  | 194159   | 20.3%  |
| 75-84                                                                 | 52427      | 27.7%  | 265372   | 27.7%  |
| 85+                                                                   | 46986      | 24.8%  | 239581   | 25.0%  |
| Age group, n (%)                                                      |            |        |          |        |
| <65                                                                   | 51501      | 27.2%  | 257634   | 26.9%  |
| ≥65 or more                                                           | 138089     | 72.8%  | 699112   | 73.1%  |
| Gender, n (%)                                                         |            |        |          |        |
| 0: Male                                                               | 93434      | 49.3%  | 470818   | 49.2%  |
| 1: Female                                                             | 96156      | 50.7%  | 485927   | 50.8%  |
| Race, n (%)                                                           |            |        |          |        |
| 1: White                                                              | 114128     | 60.2%  | 577503   | 60.4%  |
| 2: Black                                                              | 36072      | 19.0%  | 181612   | 19.0%  |
| 3: Hispanic                                                           | 13353      | 7.0%   | 69580    | 7.3%   |
| 4: Asian/Pacific Islander/Native American/other                       | 7682       | 4.1%   | 40561    | 4.2%   |
| Missing/invalid/NA                                                    | 18355      | 9.7%   | 87489    | 9.1%   |
| Primary expected payer, n (%)                                         |            |        |          |        |
| 1: Medicare                                                           | 143911     | 75.9%  | 727221   | 76.0%  |
| 2: Medicaid                                                           | 14256      | 7.5%   | 72437    | 7.6%   |
| 3: Private insurance                                                  | 21666      | 11.4%  | 108956   | 11.4%  |
| 4: Self-pay/no charge/other                                           | 9757       | 5.1%   | 48131    | 5.0%   |
| Median household income national quartile for patient ZIP code, n (%) |            |        |          |        |
| 1: First quartile (the poorest)                                       | 62888      | 33.2%  | 315315   | 33.0%  |
| 2: Second quartile                                                    | 48050      | 25.3%  | 242688   | 25.4%  |
| 3: Third quartile                                                     | 46247      | 24.4%  | 232032   | 24.3%  |
| 4: Fourth quartile                                                    | 32405      | 17.1%  | 166710   | 17.4%  |
| Patient location: NCHS Urban-Rural Code (V2006), n (%)                |            |        |          |        |
| 1: Large Central Metro                                                | 57073      | 30.1%  | 288406   | 30.1%  |
| 2: Large Fringe Metro                                                 | 44534      | 23.5%  | 225952   | 23.6%  |
| 3: Medium Metro                                                       | 30482      | 16.1%  | 146560   | 15.3%  |
| 4: Small Metro                                                        | 19741      | 10.4%  | 97846    | 10.2%  |
| 5: Micropolitan                                                       | 20569      | 10.8%  | 108925   | 11.4%  |
| 6: Noncore                                                            | 17191      | 9.1%   | 89057    | 9.3%   |
| HCUP emergency department service indicator, n (%)                    |            |        |          |        |
| 0: Record does not meet any HCUP emergency department criteria        | 46861      | 24.7%  | 230990   | 24.1%  |
| 1: Emergency department admission                                     | 142729     | 75.3%  | 725755   | 75.9%  |
| Died during hospitalization, n (%)                                    |            |        |          |        |
| 0: Did not die in hospital                                            | 183757     | 96.9%  | 926874   | 96.9%  |
| 1: Died in hospital                                                   | 5833       | 3.1%   | 29872    | 3.1%   |
| Bed size of hospital, n (%)                                           |            |        |          |        |
| 1: Small                                                              | 25662      | 13.5%  | 131599   | 13.8%  |
| 2: Medium                                                             | 44083      | 23.3%  | 225908   | 23.6%  |
| 3: Large                                                              | 119845     | 63.2%  | 599238   | 62.6%  |
| Control/ownership of hospital, n (%)                                  |            |        |          |        |
| 1: Government, nonfederal (public)                                    | 22346      | 11.8%  | 110738   | 11.6%  |
| 2: Private, not-for-profit (voluntary)                                | 139568     | 73.6%  | 710034   | 74.2%  |
| 3: Private, investor-owned (proprietary)                              | 27676      | 14.6%  | 135974   | 14.2%  |
| Location (urban/rural) of hospital, n (%)                             |            |        |          |        |
| 0: Rural                                                              | 27907      | 14.7%  | 151259   | 15.8%  |
| 1: Urban                                                              | 161683     | 85.3%  | 805487   | 84.2%  |

(continued on next page)

Supplementary Table I. (continued)

| Variable                                                                                     | Unweighted |       | Weighted |       |
|----------------------------------------------------------------------------------------------|------------|-------|----------|-------|
|                                                                                              | n/mean     | %/SE  | n/mean   | %/SE  |
| Region of hospital, n (%)                                                                    |            |       |          |       |
| 1: Northeast                                                                                 | 26632      | 14.0% | 175225   | 18.3% |
| 2: Midwest                                                                                   | 48613      | 25.6% | 231170   | 24.2% |
| 3: South                                                                                     | 86018      | 45.4% | 412845   | 43.2% |
| 4: West                                                                                      | 28327      | 14.9% | 137505   | 14.4% |
| Divisions of hospital, n (%)                                                                 |            |       |          |       |
| New England                                                                                  | 5010       | 2.6%  | 34251    | 3.6%  |
| Middle Atlantic                                                                              | 21622      | 11.4% | 140974   | 14.7% |
| South Atlantic                                                                               | 47967      | 25.3% | 228929   | 23.9% |
| West South Central                                                                           | 24597      | 13.0% | 118317   | 12.4% |
| East South Central                                                                           | 13454      | 7.1%  | 65599    | 6.9%  |
| West North Central                                                                           | 13316      | 7.0%  | 64329    | 6.7%  |
| East North Central                                                                           | 35297      | 18.6% | 166841   | 17.4% |
| Mountain                                                                                     | 8121       | 4.3%  | 38919    | 4.1%  |
| Pacific                                                                                      | 20206      | 10.7% | 98586    | 10.3% |
| Teaching status of hospital, n (%)                                                           |            |       |          |       |
| 0: Nonteaching                                                                               | 112080     | 59.1% | 561204   | 58.7% |
| 1: Teaching                                                                                  | 77510      | 40.9% | 395541   | 41.3% |
| Length of stay, mean (SE)                                                                    | 5.2        | 0.1   | 5.2      | 0.1   |
| Total estimated cost, mean (SE)                                                              | 10698      | 281.3 | 10775    | 311.3 |
| Comorbidities, n (%)                                                                         |            |       |          |       |
| Hypertension                                                                                 | 129761     | 68.4% | 653503   | 68.3% |
| Diabetes, uncomplicated or with chronic complications                                        | 84451      | 44.5% | 424414   | 44.4% |
| Renal failure                                                                                | 79982      | 42.2% | 400513   | 41.9% |
| Atrial fibrillation                                                                          | 72694      | 38.3% | 367234   | 38.4% |
| Chronic pulmonary disease                                                                    | 70533      | 37.2% | 355423   | 37.1% |
| Deficiency anemias                                                                           | 59704      | 31.5% | 298108   | 31.2% |
| Fluid and electrolyte disorders                                                              | 56359      | 29.7% | 281606   | 29.4% |
| Obesity                                                                                      | 32762      | 17.3% | 163503   | 17.1% |
| Hypothyroidism                                                                               | 32036      | 16.9% | 159973   | 16.7% |
| Peripheral vascular disorders                                                                | 22820      | 12.0% | 113819   | 11.9% |
| Depression                                                                                   | 18638      | 9.8%  | 93475    | 9.8%  |
| Other neurological disorders                                                                 | 13458      | 7.1%  | 67610    | 7.1%  |
| Coagulopathy                                                                                 | 10495      | 5.5%  | 52199    | 5.5%  |
| Weight loss                                                                                  | 8204       | 4.3%  | 40853    | 4.3%  |
| Rheumatoid arthritis/collagen vascular diseases                                              | 5604       | 3.0%  | 28126    | 2.9%  |
| Psychoses                                                                                    | 5309       | 2.8%  | 26559    | 2.8%  |
| Liver disease                                                                                | 5111       | 2.7%  | 25680    | 2.7%  |
| Alcohol abuse                                                                                | 4862       | 2.6%  | 24441    | 2.6%  |
| Drug abuse                                                                                   | 4245       | 2.2%  | 21479    | 2.2%  |
| Paralysis                                                                                    | 3299       | 1.7%  | 16674    | 1.7%  |
| Solid tumor without metastasis                                                               | 3203       | 1.7%  | 16276    | 1.7%  |
| Congestive heart failure                                                                     | 2155       | 1.1%  | 10747    | 1.1%  |
| Lymphoma                                                                                     | 1813       | 1.0%  | 9192     | 1.0%  |
| Metastatic cancer                                                                            | 1800       | 0.9%  | 9207     | 1.0%  |
| Chronic blood loss anemia                                                                    | 1752       | 0.9%  | 8660     | 0.9%  |
| Valvular disease                                                                             | 712        | 0.4%  | 3565     | 0.4%  |
| Pulmonary circulation disorders                                                              | 648        | 0.3%  | 3275     | 0.3%  |
| Acquired immune deficiency syndrome                                                          | 337        | 0.2%  | 1663     | 0.2%  |
| Peptic ulcer disease excluding bleeding                                                      | 51         | 0.0%  | 271      | 0.0%  |
| Single-level CCS—procedure,* n (%)                                                           |            |       |          |       |
| Diagnostic cardiac catheterization, coronary arteriography                                   | 14231      | 7.5%  | 70354    | 7.4%  |
| Respiratory intubation and mechanical ventilation                                            | 13723      | 7.2%  | 70852    | 7.4%  |
| Blood transfusion                                                                            | 13820      | 7.3%  | 69631    | 7.3%  |
| Diagnostic ultrasound of heart (echocardiogram)                                              | 13302      | 7.0%  | 68781    | 7.2%  |
| Hemodialysis                                                                                 | 12587      | 6.6%  | 63166    | 6.6%  |
| Other vascular catheterization, not heart                                                    | 9956       | 5.3%  | 49193    | 5.1%  |
| Incision of pleura, thoracentesis, chest drainage                                            | 8286       | 4.4%  | 41327    | 4.3%  |
| Other therapeutic procedures                                                                 | 6802       | 3.6%  | 37008    | 3.9%  |
| Insertion, revision, replacement, removal of cardiac pacemaker or cardioverter/defibrillator | 6380       | 3.4%  | 31566    | 3.3%  |

**Supplementary Table I.** (continued)

| Variable                                                          | Unweighted |      | Weighted |      |
|-------------------------------------------------------------------|------------|------|----------|------|
|                                                                   | n/mean     | %/SE | n/mean   | %/SE |
| Other non-OR therapeutic cardiovascular procedures                | 4477       | 2.4% | 22140    | 2.3% |
| Other diagnostic procedures (interview, evaluation, consultation) | 4075       | 2.1% | 20391    | 2.1% |
| Upper gastrointestinal endoscopy, biopsy                          | 3419       | 1.8% | 17062    | 1.8% |
| Conversion of cardiac rhythm                                      | 2722       | 1.4% | 13597    | 1.4% |
| Indwelling catheter                                               | 2447       | 1.3% | 13143    | 1.4% |
| Other OR procedures on vessels other than head and neck           | 2565       | 1.4% | 12671    | 1.3% |
| Arterio- or venogram (not heart and head)                         | 2414       | 1.3% | 11845    | 1.2% |
| Percutaneous transluminal coronary angioplasty                    | 1716       | 0.9% | 8440     | 0.9% |
| Other diagnostic ultrasound                                       | 1778       | 0.9% | 9570     | 1.0% |
| Other OR heart procedures                                         | 1576       | 0.8% | 7767     | 0.8% |
| CT scan chest                                                     | 1537       | 0.8% | 8527     | 0.9% |

\* HCUP CCS for ICD-9-CM. HCUP. Agency for Healthcare Research and Quality, Rockville, MD. [www.hcup-us.ahrq.gov/toolssoftware/ccs/ccs.jsp](http://www.hcup-us.ahrq.gov/toolssoftware/ccs/ccs.jsp). Accessed June 18, 2013.

**Supplementary Table II.** Subgroup analysis: hospital costs  $\leq 10$  percentile versus  $\geq 90$  percentile

| Variable                                                              | Hospital costs $\leq 10$ percentile |          |        | Hospital costs $\geq 90$ percentile |          |        | P value <sup>‡</sup> |
|-----------------------------------------------------------------------|-------------------------------------|----------|--------|-------------------------------------|----------|--------|----------------------|
|                                                                       | # of discharges                     | Weighted |        | # of discharges                     | Weighted |        |                      |
|                                                                       |                                     | n/mean   | %/SE   |                                     | n/mean   | %/SE   |                      |
| HF hospital stays                                                     | 19328                               | 95674    | 100.0% | 18716                               | 95677    | 100.0% |                      |
| Age, mean (SE)                                                        | 19328                               | 74       | 0.3    | 18716                               | 70       | 0.4    | <.001                |
| Age group, n (%)                                                      |                                     |          |        |                                     |          |        |                      |
| 18-44                                                                 | 832                                 | 4077     | 4.3%   | 815                                 | 4095     | 4.3%   |                      |
| 45-54                                                                 | 1645                                | 8122     | 8.5%   | 1743                                | 8761     | 9.2%   |                      |
| 55-64                                                                 | 2675                                | 13158    | 13.8%  | 3483                                | 17530    | 18.3%  |                      |
| 65-74                                                                 | 3692                                | 18192    | 19.0%  | 4781                                | 24354    | 25.5%  |                      |
| 75-84                                                                 | 5253                                | 26079    | 27.3%  | 5178                                | 26587    | 27.8%  |                      |
| 85+                                                                   | 5231                                | 26047    | 27.2%  | 2716                                | 14351    | 15.0%  | <.001                |
| Age group, n (%)                                                      |                                     |          |        |                                     |          |        |                      |
| <65                                                                   | 5152                                | 25357    | 26.5%  | 6041                                | 30386    | 31.8%  |                      |
| $\geq 65$                                                             | 14176                               | 70318    | 73.5%  | 12675                               | 65291    | 68.2%  | <.001                |
| Gender, n (%)                                                         |                                     |          |        |                                     |          |        |                      |
| 0: Male                                                               | 9955                                | 49248    | 51.5%  | 10486                               | 53418    | 55.8%  |                      |
| 1: Female                                                             | 9373                                | 46426    | 48.5%  | 8230                                | 42259    | 44.2%  | <.001                |
| Race, n (%)                                                           |                                     |          |        |                                     |          |        |                      |
| 1: White                                                              | 12076                               | 59884    | 62.6%  | 10928                               | 55740    | 58.3%  |                      |
| 2: Black                                                              | 3920                                | 19326    | 20.2%  | 3512                                | 18054    | 18.9%  |                      |
| 3: Hispanic                                                           | 869                                 | 4492     | 4.7%   | 1650                                | 8700     | 9.1%   |                      |
| 4: Asian/Pacific Islander/Native American/other                       | 585                                 | 3024     | 3.2%   | 1116                                | 6063     | 6.3%   |                      |
| Missing/invalid/NA                                                    | 1878                                | 8948     | 9.4%   | 1510                                | 7120     | 7.4%   | <.001                |
| Primary expected payer, n (%)                                         |                                     |          |        |                                     |          |        |                      |
| 1: Medicare                                                           | 14456                               | 71546    | 74.8%  | 13500                               | 69216    | 72.3%  |                      |
| 2: Medicaid                                                           | 1298                                | 6470     | 6.8%   | 1764                                | 9078     | 9.5%   |                      |
| 3: Private insurance                                                  | 2310                                | 11487    | 12.0%  | 2611                                | 13231    | 13.8%  |                      |
| 4: Self-pay/no charge/other                                           | 1264                                | 6173     | 6.5%   | 841                                 | 4153     | 4.3%   | <.001                |
| Median household income national quartile for patient ZIP code, n (%) |                                     |          |        |                                     |          |        |                      |
| 1: First quartile (the poorest)                                       | 7752                                | 38539    | 40.3%  | 5482                                | 27654    | 28.9%  |                      |
| 2: Second quartile                                                    | 5065                                | 25168    | 26.3%  | 4360                                | 22158    | 23.2%  |                      |
| 3: Third quartile                                                     | 4147                                | 20208    | 21.1%  | 4716                                | 24142    | 25.2%  |                      |
| 4: Fourth quartile                                                    | 2364                                | 11759    | 12.3%  | 4158                                | 21723    | 22.7%  | <.001                |
| Patient location: NCHS Urban-Rural Code (V2006), n (%)                |                                     |          |        |                                     |          |        |                      |
| 1: Large Central Metro                                                | 4060                                | 19992    | 20.9%  | 7241                                | 37554    | 39.3%  |                      |
| 2: Large Fringe Metro                                                 | 4320                                | 21195    | 22.2%  | 4533                                | 23500    | 24.6%  |                      |
| 3: Medium Metro                                                       | 3482                                | 16659    | 17.4%  | 2662                                | 12795    | 13.4%  |                      |
| 4: Small Metro                                                        | 2492                                | 12140    | 12.7%  | 1493                                | 7434     | 7.8%   |                      |
| 5: Micropolitan                                                       | 2670                                | 13856    | 14.5%  | 1535                                | 8066     | 8.4%   |                      |
| 6: Noncore                                                            | 2304                                | 11833    | 12.4%  | 1252                                | 6328     | 6.6%   | <.001                |
| HCUP emergency department service indicator, n (%)                    |                                     |          |        |                                     |          |        |                      |
| 0: Record does not meet any HCUP emergency department criteria        | 6529                                | 32189    | 33.6%  | 6592                                | 32755    | 34.2%  |                      |
| 1: Emergency department admission                                     | 12799                               | 63485    | 66.4%  | 12124                               | 62923    | 65.8%  | .774                 |
| Died during hospitalization, n (%)                                    |                                     |          |        |                                     |          |        |                      |
| 0: Did not die in hospital                                            | 18373                               | 90791    | 94.9%  | 17326                               | 88481    | 92.5%  |                      |
| 1: Died in hospital                                                   | 955                                 | 4883     | 5.1%   | 1390                                | 7196     | 7.5%   | <.001                |
| Bed size of hospital, n (%)                                           |                                     |          |        |                                     |          |        |                      |
| 1: Small                                                              | 2783                                | 13779    | 14.4%  | 1690                                | 8865     | 9.3%   |                      |
| 2: Medium                                                             | 4730                                | 23468    | 24.5%  | 3762                                | 20045    | 21.0%  |                      |
| 3: Large                                                              | 11815                               | 58428    | 61.1%  | 13264                               | 66767    | 69.8%  | .006                 |

**Supplementary Table II.** (continued)

| Variable                                              | Hospital costs ≤10 percentile |          |       | Hospital costs ≥90 percentile |          |        | P value <sup>‡</sup> |
|-------------------------------------------------------|-------------------------------|----------|-------|-------------------------------|----------|--------|----------------------|
|                                                       | # of discharges               | Weighted |       | # of discharges               | Weighted |        |                      |
|                                                       |                               | n/mean   | %/SE  |                               | n/mean   | %/SE   |                      |
| Control/ownership of hospital, n (%)                  |                               |          |       |                               |          |        |                      |
| 1: Government, nonfederal (public)                    | 2342                          | 11872    | 12.4% | 2084                          | 10030    | 10.5%  |                      |
| 2: Private, not-for-profit (voluntary)                | 12812                         | 63284    | 66.1% | 14583                         | 75484    | 78.9%  |                      |
| 3: Private, investor-owned (proprietary)              | 4174                          | 20518    | 21.4% | 2049                          | 10164    | 10.6%  | <.001                |
| Location (urban/rural) of hospital, n (%)             |                               |          |       |                               |          |        |                      |
| 0: Rural                                              | 3916                          | 20714    | 21.7% | 1238                          | 6973     | 7.3%   |                      |
| 1: Urban                                              | 15412                         | 74961    | 78.3% | 17478                         | 88704    | 92.7%  | <.001                |
| Region of hospital, n (%)                             |                               |          |       |                               |          |        |                      |
| 1: Northeast                                          | 1424                          | 9474     | 9.9%  | 3729                          | 24097    | 25.2%  |                      |
| 2: Midwest                                            | 4904                          | 23393    | 24.5% | 3831                          | 17941    | 18.8%  |                      |
| 3: South                                              | 11466                         | 55259    | 57.8% | 7515                          | 35847    | 37.5%  |                      |
| 4: West                                               | 1534                          | 7549     | 7.9%  | 3641                          | 17792    | 18.6%  | <.001                |
| Divisions of hospital, n (%)                          |                               |          |       |                               |          |        |                      |
| New England                                           | 206                           | 1434     | 1.5%  | 471                           | 3144     | 3.3%   |                      |
| Middle Atlantic                                       | 1218                          | 8039     | 8.4%  | 3                             | 20953    | 21.9%  |                      |
| South Atlantic                                        | 6520                          | 31355    | 32.8% | 3902                          | 18452    | 19.3%  |                      |
| West South Central                                    | 2864                          | 13751    | 14.4% | 2372                          | 11515    | 12.0%  |                      |
| East South Central                                    | 2082                          | 10153    | 10.6% | 1241                          | 5880     | 6.1%   |                      |
| West North Central                                    | 1250                          | 6095     | 6.4%  | 1096                          | 5175     | 5.4%   |                      |
| East North Central                                    | 3654                          | 17298    | 18.1% | 2735                          | 12766    | 13.3%  |                      |
| Mountain                                              | 629                           | 3089     | 3.2%  | 726                           | 3515     | 3.7%   |                      |
| Pacific                                               | 905                           | 4460     | 4.7%  | 2915                          | 14277    | 14.9%  | <.001                |
| Teaching status of hospital, n (%)                    |                               |          |       |                               |          |        |                      |
| 0: Nonteaching                                        | 12345                         | 61581    | 64.4% | 8398                          | 42113    | 44.0%  |                      |
| 1: Teaching                                           | 6983                          | 34093    | 35.6% | 10318                         | 53565    | 56.0%  | <.001                |
| Length of stay, mean (SE)                             | 19328                         | 1.8      | 0.00  | 18716                         | 13.7     | 0.3    | <.001                |
| Total estimated cost, mean (SE)                       | 19328                         | 2323     | 13.3  | 18716                         | 41113    | 1311.3 | <.001                |
| Comorbidities, n (%)                                  |                               |          |       |                               |          |        |                      |
| Hypertension                                          | 13411                         | 66321    | 69.3% | 11727                         | 59725    | 62.4%  | <.001                |
| Renal insufficiency                                   | 6808                          | 33417    | 34.9% | 9146                          | 46466    | 48.6%  | <.001                |
| Diabetes, uncomplicated or with chronic complications | 7652                          | 37800    | 39.5% | 8548                          | 43357    | 45.3%  | <.001                |
| Fluid and electrolyte disorders                       | 3382                          | 16579    | 17.3% | 8466                          | 42760    | 44.7%  | <.001                |
| Atrial fibrillation                                   | 6758                          | 33431    | 34.9% | 7720                          | 39539    | 41.3%  | <.001                |
| Chronic pulmonary disease                             | 5578                          | 27658    | 28.9% | 6946                          | 35523    | 37.1%  | <.001                |
| Deficiency anemias                                    | 4117                          | 20153    | 21.1% | 6566                          | 33079    | 34.6%  | <.001                |
| Obesity                                               | 2269                          | 11175    | 11.7% | 3815                          | 19188    | 20.1%  | <.001                |
| Hypothyroidism                                        | 2998                          | 14777    | 15.4% | 2773                          | 13941    | 14.6%  | .129                 |
| Peripheral vascular disorders                         | 2040                          | 10024    | 10.5% | 2612                          | 13138    | 13.7%  | <.001                |
| Depression                                            | 1641                          | 8055     | 8.4%  | 1643                          | 8291     | 8.7%   | .548                 |
| Coagulopathy                                          | 577                           | 2805     | 2.9%  | 2241                          | 11202    | 11.7%  | <.001                |
| Weight loss                                           | 363                           | 1772     | 1.9%  | 1964                          | 9908     | 10.4%  | <.001                |
| Other neurological disorders                          | 1128                          | 5566     | 5.8%  | 1224                          | 6282     | 6.6%   | .012                 |
| Liver disease                                         | 304                           | 1484     | 1.6%  | 829                           | 4249     | 4.4%   | <.001                |
| Congestive heart failure                              | 24                            | 117      | 0.1%  | 1025                          | 5164     | 5.4%   | <.001                |
| Psychoses                                             | 412                           | 2040     | 2.1%  | 587                           | 2950     | 3.1%   | <.001                |
| Alcohol abuse                                         | 387                           | 1913     | 2.0%  | 605                           | 3087     | 3.2%   | <.001                |
| Rheumatoid arthritis/collagen vascular diseases       | 474                           | 2334     | 2.4%  | 549                           | 2781     | 2.9%   | .007                 |
| Drug abuse                                            | 387                           | 1943     | 2.0%  | 431                           | 2219     | 2.3%   | .347                 |
| Paralysis                                             | 199                           | 993      | 1.0%  | 467                           | 2425     | 2.5%   | <.001                |
| Solid tumor without metastasis                        | 256                           | 1262     | 1.3%  | 353                           | 1886     | 2.0%   | <.001                |
| Chronic blood loss anemia                             | 79                            | 386      | 0.4%  | 287                           | 1417     | 1.5%   | <.001                |
| Valvular disease                                      | §                             | §        | §     | 352                           | 1749     | 1.8%   | <.001                |

(continued on next page)

Supplementary Table II. (continued)

| Variable                                                                         | Hospital costs ≤10 percentile |          |      | Hospital costs ≥90 percentile |          |       | P value <sup>‡</sup> |
|----------------------------------------------------------------------------------|-------------------------------|----------|------|-------------------------------|----------|-------|----------------------|
|                                                                                  | # of discharges               | Weighted |      | # of discharges               | Weighted |       |                      |
|                                                                                  |                               | n/mean   | %/SE |                               | n/mean   | %/SE  |                      |
| Pulmonary circulation disorders                                                  | §                             | §        | §    | 345                           | 1759     | 1.8%  | <.001                |
| Lymphoma                                                                         | 148                           | 755      | 0.8% | 236                           | 1238     | 1.3%  | <.001                |
| Metastatic cancer                                                                | 120                           | 586      | 0.6% | 215                           | 1118     | 1.2%  | <.001                |
| Acquired immune deficiency syndrome                                              | 37                            | 179      | 0.2% | 35                            | 174      | 0.2%  | .929                 |
| Peptic ulcer disease excluding bleeding                                          | §                             | §        | §    | §                             | §        | §     | §                    |
| Single-level CCS—procedure* <sup>†</sup> , n (%)                                 |                               |          |      |                               |          |       |                      |
| Diagnostic cardiac catheterization, coronary arteriography                       | 63                            | 302      | 0.3% | 4475                          | 22477    | 23.5% | <.001                |
| Respiratory intubation and mechanical ventilation                                | 372                           | 1911     | 2.0% | 4177                          | 21570    | 22.5% | <.001                |
| Other vascular catheterization, not heart                                        | 89                            | 447      | 0.5% | 4300                          | 21478    | 22.4% | <.001                |
| Blood transfusion                                                                | 227                           | 1117     | 1.2% | 3855                          | 19646    | 20.5% | <.001                |
| Insertion, revision, replacement, removal of cardiac pacemaker or cardioverter/d | 27                            | 134      | 0.1% | 5058                          | 24984    | 26.1% | <.001                |
| Diagnostic ultrasound of heart (echocardiogram)                                  | 467                           | 2278     | 2.4% | 2441                          | 12627    | 13.2% | <.001                |
| Hemodialysis                                                                     | 757                           | 3736     | 3.9% | 2566                          | 12969    | 13.6% | <.001                |
| Other non-OR therapeutic cardiovascular procedures                               | §                             | §        | §    | 2505                          | 12496    | 13.1% | <.001                |
| Incision of pleura, thoracentesis, chest drainage                                | 145                           | 702      | 0.7% | 2001                          | 10170    | 10.6% | <.001                |
| Other therapeutic procedures                                                     | 235                           | 1233     | 1.3% | 1687                          | 9122     | 9.5%  | <.001                |
| Other OR procedures on vessels other than head and neck                          | §                             | §        | §    | 1360                          | 6794     | 7.1%  | <.001                |
| Other diagnostic procedures (interview, evaluation, consultation)                | 215                           | 1016     | 1.1% | 1354                          | 6785     | 7.1%  | <.001                |
| Arterio- or venogram (not heart and head)                                        | 13                            | 62       | 0.1% | 1292                          | 6366     | 6.7%  | <.001                |
| Upper gastrointestinal endoscopy, biopsy                                         | 19                            | 91       | 0.1% | 886                           | 4499     | 4.7%  | <.001                |
| Percutaneous transluminal coronary angioplasty                                   | §                             | §        | §    | 892                           | 4445     | 4.6%  | <.001                |
| Other OR heart procedures                                                        | §                             | §        | §    | 1361                          | 6709     | 7.0%  | <.001                |
| Conversion of cardiac rhythm                                                     | 85                            | 415      | 0.4% | 967                           | 4875     | 5.1%  | <.001                |
| Extracorporeal circulation auxiliary to open heart procedures                    | §                             | §        | §    | 1015                          | 5045     | 5.3%  | <.001                |
| Swan-Ganz catheterization for monitoring                                         | §                             | §        | §    | 649                           | 3224     | 3.4%  | <.001                |
| Diagnostic bronchoscopy and biopsy of bronchus                                   | §                             | §        | §    | 599                           | 2999     | 3.1%  | <.001                |

## Notes:

\*HCUP CCS for ICD-9-CM. HCUP. Agency for Healthcare Research and Quality, Rockville, MD. [www.hcup-us.ahrq.gov/toolssoftware/ccs/ccs.jsp](http://www.hcup-us.ahrq.gov/toolssoftware/ccs/ccs.jsp). Accessed June 18, 2013.

<sup>†</sup>Top 20 single-level CCS—procedure among hospital charges ≥80 percentile.

<sup>‡</sup>For categorical variables, Pearson  $\chi^2$  test was performed. For continuous variables, adjusted Wald test was performed.

<sup>§</sup>Cannot display because of raw or weighted observation ≤10

| Variable                           | Hospital costs ≤10 percentile |          |     | Hospital costs ≥90 percentile |          |       | P value |
|------------------------------------|-------------------------------|----------|-----|-------------------------------|----------|-------|---------|
|                                    | # of discharges               | Weighted |     | # of discharges               | Weighted |       |         |
|                                    |                               | Median   | IQR |                               | Median   | IQR   |         |
| Age, median (IQR)                  | 19328                         | 76       | 22  | 18716                         | 72       | 19.0  | NA      |
| Total estimated cost, median (IQR) | 19328                         | 2450     | 799 | 18716                         | 30080    | 19162 | NA      |

**Supplementary Table III.** Predictors of most expensive hospital cost estimates (top 10th percentile compared to lowest 10th percentile)

|                                                                                                   | OR    | Lower (95% CI) OR | Upper (95% CI) OR | P value |
|---------------------------------------------------------------------------------------------------|-------|-------------------|-------------------|---------|
| Discharge characteristics                                                                         |       |                   |                   |         |
| ≤64 (ref.)                                                                                        |       |                   |                   |         |
| ≥65                                                                                               | 0.81  | 0.73              | 0.91              | .0002   |
| Male (ref.)                                                                                       |       |                   |                   |         |
| Female                                                                                            | 0.78  | 0.73              | 0.84              | <.0001  |
| White (ref.)                                                                                      |       |                   |                   |         |
| Black                                                                                             | 1.04  | 0.86              | 1.25              | .6847   |
| Hispanic                                                                                          | 1.35  | 0.99              | 1.84              | .0562   |
| Asian/Pacific Islander/Native American/other                                                      | 1.51  | 1.2               | 1.9               | .0005   |
| Missing                                                                                           | 1.07  | 0.75              | 1.53              | .6885   |
| Medicare (ref.)                                                                                   |       |                   |                   |         |
| Medicaid                                                                                          | 0.97  | 0.82              | 1.14              | .6912   |
| Private insurance                                                                                 | 1.05  | 0.9               | 1.22              | .5503   |
| Self-pay/no charge/Other                                                                          | 0.72  | 0.61              | 0.85              | .0001   |
| Median household income national quartile for patient ZIP code: 1st quartile (the poorest) (ref.) |       |                   |                   |         |
| Median household income national quartile for patient ZIP code: 2nd quartile                      | 1.07  | 0.91              | 1.25              | .4104   |
| Median household income national quartile for patient ZIP code: 3rd quartile                      | 1.21  | 1.02              | 1.43              | .0327   |
| Median household income national quartile for patient ZIP code: 4th quartile                      | 1.75  | 1.34              | 2.28              | <.0001  |
| Not emergency department admission (ref.)                                                         |       |                   |                   |         |
| Emergency department admission                                                                    | 0.57  | 0.48              | 0.68              | <.0001  |
| Comorbidities                                                                                     |       |                   |                   |         |
| No hypertension (ref.)                                                                            |       |                   |                   |         |
| Hypertension                                                                                      | 0.71  | 0.66              | 0.76              | <.0001  |
| No renal failure (ref.)                                                                           |       |                   |                   |         |
| Renal failure                                                                                     | 1.11  | 1.03              | 1.2               | .0099   |
| No diabetes (ref.)                                                                                |       |                   |                   |         |
| Diabetes, uncomplicated or with chronic complications                                             | 1.11  | 1.04              | 1.18              | .0008   |
| No fluid and electrolyte disorders (ref.)                                                         |       |                   |                   |         |
| Fluid and electrolyte disorders                                                                   | 2.85  | 2.61              | 3.11              | <.0001  |
| No atrial fibrillation (ref.)                                                                     |       |                   |                   |         |
| Atrial fibrillation                                                                               | 1.19  | 1.12              | 1.27              | <.0001  |
| No chronic pulmonary disease (ref.)                                                               |       |                   |                   |         |
| Chronic pulmonary disease                                                                         | 1.41  | 1.31              | 1.51              | <.0001  |
| No deficiency anemias (ref.)                                                                      |       |                   |                   |         |
| Deficiency anemias                                                                                | 1.2   | 1.1               | 1.31              | .0001   |
| No obesity (ref.)                                                                                 |       |                   |                   |         |
| Obesity                                                                                           | 1.81  | 1.64              | 1.99              | <.0001  |
| No peripheral vascular disorders (ref.)                                                           |       |                   |                   |         |
| Peripheral vascular disorders                                                                     | 1.26  | 1.15              | 1.39              | <.0001  |
| Single-level CCS—procedure                                                                        |       |                   |                   |         |
| No respiratory intubation and mechanical ventilation (ref.)                                       |       |                   |                   |         |
| Respiratory intubation and mechanical ventilation                                                 | 8.19  | 6.87              | 9.75              | <.0001  |
| No blood transfusion (ref.)                                                                       |       |                   |                   |         |
| Blood transfusion                                                                                 | 14.72 | 12.28             | 17.65             | <.0001  |
| No diagnostic ultrasound of heart (echocardiogram) (ref.)                                         |       |                   |                   |         |
| Diagnostic ultrasound of heart (echocardiogram)                                                   | 3.96  | 2.87              | 5.46              | <.0001  |
| No hemodialysis (ref.)                                                                            |       |                   |                   |         |
| Hemodialysis                                                                                      | 2.26  | 1.93              | 2.64              | <.0001  |
| No incision of pleura, thoracentesis, chest drainage (ref.)                                       |       |                   |                   |         |
| Incision of pleura, thoracentesis, chest drainage                                                 | 12.16 | 9.8               | 15.08             | <.0001  |
| No other therapeutic procedures (ref.)                                                            |       |                   |                   |         |
| Other therapeutic procedures                                                                      | 4.02  | 2.31              | 7                 | <.0001  |
| Hospital characteristics                                                                          |       |                   |                   |         |
| Bed size of hospital: small (ref.)                                                                |       |                   |                   |         |
| Bed size of hospital: medium                                                                      | 0.98  | 0.66              | 1.46              | .9243   |
| Bed size of hospital: large                                                                       | 1.4   | 1.03              | 1.9               | .0301   |
| Government, nonfederal (public) (ref.)                                                            |       |                   |                   |         |
| Private, not-for-profit (voluntary)                                                               | 0.8   | 0.59              | 1.09              | .1618   |
| Private, investor-owned (proprietary)                                                             | 0.55  | 0.36              | 0.82              | .0033   |
| Location of hospital: rural (ref.)                                                                |       |                   |                   |         |

(continued on next page)

**Supplementary Table III.** (continued)

|                             | OR    | Lower (95% CI) OR | Upper (95% CI) OR | P value |
|-----------------------------|-------|-------------------|-------------------|---------|
| Location of hospital: urban | 1.97  | 1.41              | 2.75              | .0001   |
| Northeast (ref.)            |       |                   |                   |         |
| Midwest                     | 0.36  | 0.23              | 0.56              | <.0001  |
| South                       | 0.34  | 0.22              | 0.53              | <.0001  |
| West                        | 1.09  | 0.66              | 1.79              | .745    |
| Nonteaching (ref.)          |       |                   |                   |         |
| Teaching                    | 1.81  | 1.37              | 2.39              | <.0001  |
|                             | Value | Lower (95% CI)    | Upper (95% CI)    | P value |
| C-statistics                | 0.861 | 0.847             | 0.876             | <.0001  |

## Notes:

1. Models are typically considered reasonable when the C-statistic is higher than 0.7 and strong when C exceeds 0.8.
2. C-statistics will be likely overoptimistic because they were generated from data fitting the model.



**Supplementary Table IV.** GLM model predicting costs (n=189590)

|                                                                                                   | Exp(b) | Lower<br>(95% CI) exp(b) | Upper<br>(95% CI) exp(b) | P value |
|---------------------------------------------------------------------------------------------------|--------|--------------------------|--------------------------|---------|
| Arithmetic mean estimated cost for an HF admission for the reference group                        | \$9938 | \$8509                   | \$11607                  | <.0001  |
| Discharge characteristics                                                                         |        |                          |                          |         |
| ≤64 (ref.)                                                                                        |        |                          |                          |         |
| ≥65                                                                                               | 0.92   | 0.89                     | 0.95                     | <.0001  |
| Male (ref.)                                                                                       |        |                          |                          |         |
| Female                                                                                            | 0.94   | 0.93                     | 0.95                     | <.0001  |
| White (ref.)                                                                                      |        |                          |                          |         |
| Black                                                                                             | 1.01   | 0.97                     | 1.05                     | .7093   |
| Hispanic                                                                                          | 1.08   | 1.02                     | 1.15                     | .0093   |
| Asian/Pacific Islander/Native American/other                                                      | 1.11   | 1.04                     | 1.18                     | .0015   |
| Missing                                                                                           | 0.99   | 0.93                     | 1.06                     | .8136   |
| Medicare (ref.)                                                                                   |        |                          |                          |         |
| Medicaid                                                                                          | 1.02   | 0.99                     | 1.05                     | .2378   |
| Private insurance                                                                                 | 1.07   | 1.03                     | 1.1                      | .0001   |
| Self-pay/no charge/other                                                                          | 0.96   | 0.93                     | 1.0008                   | .0549   |
| Median household income national quartile for patient ZIP code: 1st quartile (the poorest) (ref.) |        |                          |                          |         |
| Median household income national quartile for patient ZIP code: 2nd quartile                      | 1.02   | 0.99                     | 1.06                     | .1928   |
| Median household income national quartile for patient ZIP code: 3rd quartile                      | 1.05   | 1.01                     | 1.08                     | .02     |
| Median household income national quartile for patient ZIP code: 4th quartile                      | 1.15   | 1.09                     | 1.22                     | <.0001  |
| Not emergency department admission (ref.)                                                         |        |                          |                          |         |
| Emergency department admission                                                                    | 0.77   | 0.72                     | 0.81                     | <.0001  |
| Comorbidities                                                                                     |        |                          |                          |         |
| No hypertension (ref.)                                                                            |        |                          |                          |         |
| Hypertension                                                                                      | 0.89   | 0.87                     | 0.91                     | <.0001  |
| No renal failure (ref.)                                                                           |        |                          |                          |         |
| Renal failure                                                                                     | 1.04   | 1.02                     | 1.06                     | <.0001  |
| No diabetes (ref.)                                                                                |        |                          |                          |         |
| Diabetes, uncomplicated or with chronic complications                                             | 1      | 0.98                     | 1.01                     | .5759   |
| No fluid and electrolyte disorders (ref.)                                                         |        |                          |                          |         |
| Fluid and electrolyte disorders                                                                   | 1.29   | 1.26                     | 1.32                     | <.0001  |
| No atrial fibrillation (ref.)                                                                     |        |                          |                          |         |
| Atrial fibrillation                                                                               | 1.05   | 1.03                     | 1.06                     | <.0001  |
| No chronic pulmonary disease (ref.)                                                               |        |                          |                          |         |
| Chronic pulmonary disease                                                                         | 1.05   | 1.03                     | 1.06                     | <.0001  |
| No deficiency anemias (ref.)                                                                      |        |                          |                          |         |
| Deficiency anemias                                                                                | 0.99   | 0.98                     | 1.01                     | .5862   |
| No obesity (ref.)                                                                                 |        |                          |                          |         |
| Obesity                                                                                           | 1.09   | 1.07                     | 1.11                     | <.0001  |
| No peripheral vascular disorders (ref.)                                                           |        |                          |                          |         |
| Peripheral vascular disorders                                                                     | 1.05   | 1.03                     | 1.07                     | <.0001  |
| Single-level CCS—procedure                                                                        |        |                          |                          |         |
| No respiratory intubation and mechanical ventilation (ref.)                                       |        |                          |                          |         |
| Respiratory intubation and mechanical ventilation                                                 | 1.8    | 1.74                     | 1.87                     | <.0001  |
| No blood transfusion (ref.)                                                                       |        |                          |                          |         |
| Blood transfusion                                                                                 | 1.7    | 1.64                     | 1.77                     | <.0001  |
| No diagnostic ultrasound of heart (echocardiogram) (ref.)                                         |        |                          |                          |         |
| Diagnostic ultrasound of heart (echocardiogram)                                                   | 1.26   | 1.17                     | 1.35                     | <.0001  |
| No hemodialysis (ref.)                                                                            |        |                          |                          |         |
| Hemodialysis                                                                                      | 1.25   | 1.21                     | 1.29                     | <.0001  |
| No incision of pleura, thoracentesis, chest drainage (ref.)                                       |        |                          |                          |         |
| Incision of pleura, thoracentesis, chest drainage                                                 | 1.56   | 1.51                     | 1.6                      | <.0001  |
| No other therapeutic procedures (ref.)                                                            |        |                          |                          |         |
| Other therapeutic procedures                                                                      | 1.39   | 1.25                     | 1.55                     | <.0001  |
| Hospital characteristics                                                                          |        |                          |                          |         |
| Bed size of hospital: small (ref.)                                                                |        |                          |                          |         |
| Bed size of hospital: medium                                                                      | 1.01   | 0.94                     | 1.09                     | .7784   |
| Bed size of hospital: large                                                                       | 1.08   | 1.02                     | 1.14                     | .0091   |
| Government, nonfederal (public) (ref.)                                                            |        |                          |                          |         |

(continued on next page)

Supplementary Table IV. (continued)

|                                       | Exp(b) | Lower<br>(95% CI) exp(b) | Upper<br>(95% CI) exp(b) | P value |
|---------------------------------------|--------|--------------------------|--------------------------|---------|
| Private, not-for-profit (voluntary)   | 0.94   | 0.86                     | 1.02                     | .1403   |
| Private, investor-owned (proprietary) | 0.87   | 0.8                      | 0.95                     | .0028   |
| Location of hospital: rural (ref.)    |        |                          |                          |         |
| Location of hospital: urban           | 1.12   | 1.05                     | 1.18                     | .0002   |
| Northeast (ref.)                      |        |                          |                          |         |
| Midwest                               | 0.81   | 0.72                     | 0.91                     | .0004   |
| South                                 | 0.83   | 0.74                     | 0.94                     | .0024   |
| West                                  | 0.99   | 0.87                     | 1.12                     | .8663   |
| Nonteaching (ref.)                    |        |                          |                          |         |
| Teaching                              | 1.17   | 1.1                      | 1.25                     | <.0001  |

## Notes:

1. We fit a GLM with log link and gamma family.
2. There is no model fit assessment using complex survey data in general.

**Sample interpretation**

In this model, exp(b) is a factor (or rate ratio).

1. In model, the reference group is a discharge for 64 or younger, male, white, Medicare, median household income national quartile for patient ZIP code in first quartile, not admitted from emergency department, no comorbidities of interest, no procedure of interest, discharge from a small-bed size public nonteaching hospital in the rural area in the Northeast.
2. From this model, the mean cost estimates for an HF admission are \$9938 for the reference group.
3. In model, the mean estimated cost decreases by a factor 0.92 (that is, it decreases by  $[100 * (1 - 0.92)] = 8\%$ ) for a discharge for age 65 or older. That is, mean estimated cost for an HF admission is \$9143 ( $=\$9938 * 0.92$ ) for a discharge for age 65 or older, male, white, Medicare, median household income national quartile for patient ZIP code in first quartile, not admitted from emergency department, no comorbidities of interest, no procedure of interest, discharge from a small-bed size public nonteaching hospital in the rural area in the Northeast.
4. In model, the mean estimated cost for an HF admission increases by a factor 1.07 (that is, it increases by  $[100 * (1.07 - 1)] = 7\%$ ) for a discharge for private insurance. That is, mean estimated cost for an HF admission is \$10,634 ( $=\$9938 * 1.07$ ) for a discharge for age 64 or younger, male, white, private insurance, median household income national quartile for patient ZIP code in first quartile, not admitted from emergency department, no comorbidities of interest, no procedure of interest, discharge from a small-bed size public nonteaching hospital in the rural area in the Northeast.
5. In model, the mean estimated cost for an HF admission decreases by a factor 0.984 (that is, it decreases by  $100 * [1 - (0.92 * 1.07)] = 1.6\%$ ) for a discharge for age 65 or older with private insurance. That is, mean estimated cost for an HF admission is \$9779 ( $=\$9938 * 0.984$ ) for a discharge for age 65 or older, male, white, private insurance, median household income national quartile for patient ZIP code in first quartile, not admitted from emergency department, no comorbidities of interest, no procedure of interest, discharge from a small-bed size public nonteaching hospital in the rural area in the Northeast.

**Supplementary Table V.** Predictors of most expensive 20th percentile hospital cost estimates by region

|                                                                                                      | Midwest (n=18200)   |                         |        |        | Northeast (n=10630) |                         |        |        | South (n=36341)     |                         |        |        | West (n=10815)      |                         |        |        |
|------------------------------------------------------------------------------------------------------|---------------------|-------------------------|--------|--------|---------------------|-------------------------|--------|--------|---------------------|-------------------------|--------|--------|---------------------|-------------------------|--------|--------|
|                                                                                                      | Lower<br>(95%<br>OR | Upper<br>(95%<br>CI) OR |        | P      |
| Discharge characteristics                                                                            |                     |                         |        |        |                     |                         |        |        |                     |                         |        |        |                     |                         |        |        |
| ≤64 (ref.)                                                                                           |                     |                         |        |        |                     |                         |        |        |                     |                         |        |        |                     |                         |        |        |
| ≥65                                                                                                  | 0.99                | 0.85                    | 1.1442 | .8547  | 1.1                 | 0.83                    | 1.456  | .4992  | 0.82                | 0.74                    | 0.9009 | .0001  | 0.77                | 0.62                    | 0.9493 | .0153  |
| Male (ref.)                                                                                          |                     |                         |        |        |                     |                         |        |        |                     |                         |        |        |                     |                         |        |        |
| Female                                                                                               | 0.88                | 0.82                    | 0.9529 | .0016  | 0.97                | 0.87                    | 1.086  | .6005  | 0.91                | 0.85                    | 0.9691 | .0037  | 0.88                | 0.79                    | 0.9771 | .0176  |
| White (ref.)                                                                                         |                     |                         |        |        |                     |                         |        |        |                     |                         |        |        |                     |                         |        |        |
| Black                                                                                                | 1                   | 0.73                    | 1.3716 | .9912  | 1.36                | 0.85                    | 2.1666 | .1978  | 0.99                | 0.84                    | 1.1663 | .8915  | 1.04                | 0.73                    | 1.4865 | .8187  |
| Hispanic                                                                                             | 2.31                | 1.72                    | 3.114  | <.0001 | 1.06                | 0.58                    | 1.9462 | .8396  | 1.97                | 1.28                    | 3.0435 | .0023  | 0.87                | 0.63                    | 1.2047 | .4056  |
| Asian/Pacific<br>Islander/<br>Native<br>American/<br>other                                           | 1.57                | 1.2                     | 2.0621 | .0011  | 1.28                | 0.84                    | 1.9656 | .2529  | 1.53                | 1.12                    | 2.0988 | .0085  | 1.39                | 1.08                    | 1.802  | .0115  |
| Missing                                                                                              | 1.02                | 0.74                    | 1.4069 | .8906  | 0.43                | 0.19                    | 0.9304 | .0326  | 1.85                | 1.18                    | 2.9074 | .0078  | 0.74                | 0.48                    | 1.1302 | .1601  |
| Medicare (ref.)                                                                                      |                     |                         |        |        |                     |                         |        |        |                     |                         |        |        |                     |                         |        |        |
| Medicaid                                                                                             | 1.1                 | 0.92                    | 1.3111 | .2962  | 0.99                | 0.74                    | 1.3266 | .9629  | 1.05                | 0.9                     | 1.2224 | .5685  | 1.08                | 0.78                    | 1.4859 | .6373  |
| Private<br>insurance                                                                                 | 1.31                | 1.11                    | 1.5442 | .0018  | 0.95                | 0.73                    | 1.2255 | .6855  | 1.23                | 1.08                    | 1.4108 | .0024  | 0.81                | 0.53                    | 1.2461 | .3372  |
| Self-pay/<br>no charge/<br>other                                                                     | 0.95                | 0.74                    | 1.2199 | .6762  | 0.76                | 0.5                     | 1.1638 | .2056  | 0.86                | 0.72                    | 1.0177 | .0785  | 1.2                 | 0.83                    | 1.7215 | .332   |
| Median household income national quartile for patient ZIP code: 1st quartile (the poorest) (ref.)    |                     |                         |        |        |                     |                         |        |        |                     |                         |        |        |                     |                         |        |        |
| Median<br>household<br>income<br>national<br>quartile<br>for patient<br>ZIP code:<br>2nd quartile    | 1.07                | 0.9                     | 1.2715 | .4576  | 1.5                 | 0.91                    | 2.4796 | .1132  | 1                   | 0.86                    | 1.1601 | .9928  | 1.17                | 0.91                    | 1.4998 | .2326  |
| Median<br>household<br>income<br>national<br>quartile<br>for patient<br>ZIP code:<br>3rd quartile    | 1.25                | 1.03                    | 1.5063 | .0222  | 1.65                | 1.02                    | 2.6823 | .0415  | 1.18                | 0.97                    | 1.4273 | .0975  | 1.18                | 0.86                    | 1.6044 | .2986  |
| Median<br>household<br>income<br>national<br>quartile<br>for patient<br>ZIP<br>code: 4th<br>quartile | 1.49                | 1.04                    | 2.1455 | .0307  | 2.26                | 1.32                    | 3.8615 | .0031  | 1.36                | 1.02                    | 1.8143 | .0374  | 2.35                | 1.59                    | 3.4689 | <.0001 |
| Not emergency department admission (ref.)                                                            |                     |                         |        |        |                     |                         |        |        |                     |                         |        |        |                     |                         |        |        |
| Emergency<br>department<br>admission                                                                 | 0.82                | 0.62                    | 1.0899 | .1711  | 0.75                | 0.47                    | 1.204  | .2339  | 0.56                | 0.47                    | 0.6689 | <.0001 | 0.89                | 0.64                    | 1.2409 | .4972  |
| Comorbidities                                                                                        |                     |                         |        |        |                     |                         |        |        |                     |                         |        |        |                     |                         |        |        |
| No hypertension (ref.)                                                                               |                     |                         |        |        |                     |                         |        |        |                     |                         |        |        |                     |                         |        |        |
| Hypertension                                                                                         | 0.7                 | 0.64                    | 0.7638 | <.0001 | 0.64                | 0.52                    | 0.7832 | <.0001 | 0.71                | 0.66                    | 0.7603 | <.0001 | 0.71                | 0.62                    | 0.8078 | <.0001 |
| No renal failure (ref.)                                                                              |                     |                         |        |        |                     |                         |        |        |                     |                         |        |        |                     |                         |        |        |
| Renal failure                                                                                        | 1.17                | 1.09                    | 1.2682 | .0001  | 1.23                | 1.02                    | 1.4723 | .0284  | 1.13                | 1.03                    | 1.2233 | .0059  | 1.27                | 1.1                     | 1.4768 | .0013  |
| No diabetes (ref.)                                                                                   |                     |                         |        |        |                     |                         |        |        |                     |                         |        |        |                     |                         |        |        |
| Diabetes,                                                                                            | 1.28                | 1.19                    | 1.3813 | <.0001 | 1                   | 0.89                    | 1.1367 | .9461  | 1.11                | 1.04                    | 1.1932 | .0028  | 1.18                | 1.05                    | 1.3382 | .008   |

(continued on next page)

Supplementary Table V. (continued)

|                                                               | Midwest (n=18200)   |                         |            | Northeast (n=10630) |                         |            | South (n=36341)     |                         |            | West (n=10815)      |                         |            |      |      |         |        |
|---------------------------------------------------------------|---------------------|-------------------------|------------|---------------------|-------------------------|------------|---------------------|-------------------------|------------|---------------------|-------------------------|------------|------|------|---------|--------|
|                                                               | Lower<br>(95%<br>OR | Upper<br>(95%<br>CI) OR | P<br>value |      |      |         |        |
| uncomplicated<br>or with chronic<br>complications             |                     |                         |            |                     |                         |            |                     |                         |            |                     |                         |            |      |      |         |        |
| No fluid and electrolyte disorders (ref.)                     |                     |                         |            |                     |                         |            |                     |                         |            |                     |                         |            |      |      |         |        |
| Fluid and<br>electrolyte<br>disorders                         | 2.6                 | 2.33                    | 2.8969     | <.0001              | 2.54                    | 2.12       | 3.0387              | <.0001                  | 2.49       | 2.28                | 2.7282                  | <.0001     | 2.73 | 2.32 | 3.2193  | <.0001 |
| No atrial fibrillation (ref.)                                 |                     |                         |            |                     |                         |            |                     |                         |            |                     |                         |            |      |      |         |        |
| Atrial<br>fibrillation                                        | 1.26                | 1.16                    | 1.358      | <.0001              | 1.26                    | 1.08       | 1.4706              | .0034                   | 1.17       | 1.09                | 1.2455                  | <.0001     | 1.28 | 1.12 | 1.4621  | .0005  |
| No chronic pulmonary disease (ref.)                           |                     |                         |            |                     |                         |            |                     |                         |            |                     |                         |            |      |      |         |        |
| Chronic<br>pulmonary<br>disease                               | 1.57                | 1.41                    | 1.7431     | <.0001              | 1.55                    | 1.31       | 1.8249              | <.0001                  | 1.49       | 1.38                | 1.6025                  | <.0001     | 1.64 | 1.46 | 1.8303  | <.0001 |
| No deficiency anemias (ref.)                                  |                     |                         |            |                     |                         |            |                     |                         |            |                     |                         |            |      |      |         |        |
| Deficiency<br>anemias                                         | 1.32                | 1.2                     | 1.4616     | <.0001              | 1.33                    | 1.1        | 1.6213              | .0045                   | 1.17       | 1.06                | 1.2909                  | .0022      | 1.62 | 1.43 | 1.8291  | <.0001 |
| No obesity (ref.)                                             |                     |                         |            |                     |                         |            |                     |                         |            |                     |                         |            |      |      |         |        |
| Obesity                                                       | 1.84                | 1.63                    | 2.085      | <.0001              | 1.66                    | 1.37       | 2.0037              | <.0001                  | 1.59       | 1.44                | 1.7494                  | <.0001     | 1.99 | 1.73 | 2.2871  | <.0001 |
| No peripheral vascular disorders (ref.)                       |                     |                         |            |                     |                         |            |                     |                         |            |                     |                         |            |      |      |         |        |
| Peripheral<br>vascular<br>disorders                           | 1.27                | 1.13                    | 1.4306     | <.0001              | 1.21                    | 1          | 1.4563              | .0521                   | 1.15       | 1.06                | 1.2585                  | .0011      | 1.47 | 1.25 | 1.7252  | <.0001 |
| Single-level CCS—procedure                                    |                     |                         |            |                     |                         |            |                     |                         |            |                     |                         |            |      |      |         |        |
| No respiratory intubation and mechanical ventilation (ref.)   |                     |                         |            |                     |                         |            |                     |                         |            |                     |                         |            |      |      |         |        |
| Respiratory<br>intubation<br>and<br>mechanical<br>ventilation | 5.93                | 4.51                    | 7.8        | <.0001              | 3.6                     | 2.73       | 4.7404              | <.0001                  | 7.06       | 5.84                | 8.5298                  | <.0001     | 7.66 | 5.5  | 10.6686 | <.0001 |
| No blood transfusion (ref.)                                   |                     |                         |            |                     |                         |            |                     |                         |            |                     |                         |            |      |      |         |        |
| Blood<br>transfusion                                          | 7.63                | 5.84                    | 9.9654     | <.0001              | 10.1                    | 6.72       | 15.1914             | <.0001                  | 9.16       | 7.86                | 10.669                  | <.0001     | 8.37 | 5.69 | 12.3237 | <.0001 |
| No diagnostic ultrasound of heart (echocardiogram) (ref.)     |                     |                         |            |                     |                         |            |                     |                         |            |                     |                         |            |      |      |         |        |
| Diagnostic<br>ultrasound<br>of heart<br>(echocar<br>diogram)  | 4.84                | 3.04                    | 7.709      | <.0001              | 4.76                    | 2.82       | 8.0257              | <.0001                  | 2.23       | 1.63                | 3.0669                  | <.0001     | 2.46 | 1.23 | 4.9371  | .0117  |
| No hemodialysis (ref.)                                        |                     |                         |            |                     |                         |            |                     |                         |            |                     |                         |            |      |      |         |        |
| Hemodialysis                                                  | 1.91                | 1.56                    | 2.338      | <.0001              | 1.07                    | 0.74       | 1.5625              | .7121                   | 2.03       | 1.75                | 2.3649                  | <.0001     | 1.82 | 1.34 | 2.4876  | .0002  |
| No incision of pleura, thoracentesis, chest drainage (ref.)   |                     |                         |            |                     |                         |            |                     |                         |            |                     |                         |            |      |      |         |        |
| Incision of<br>pleura,<br>thoracentesis,<br>chest<br>drainage | 8.4                 | 6.26                    | 11.2819    | <.0001              | 12.54                   | 7.27       | 21.6407             | <.0001                  | 8.03       | 6.65                | 9.6961                  | <.0001     | 8.46 | 6.28 | 11.3949 | <.0001 |
| No other therapeutic procedures (ref.)                        |                     |                         |            |                     |                         |            |                     |                         |            |                     |                         |            |      |      |         |        |
| Other<br>therapeutic<br>procedures                            | 9.92                | 6.84                    | 14.3848    | <.0001              | 2.12                    | 1.26       | 3.5763              | .0052                   | 3.07       | 1.4                 | 6.7218                  | .0051      | 3.73 | 1.38 | 10.0567 | .0096  |
| Hospital characteristics                                      |                     |                         |            |                     |                         |            |                     |                         |            |                     |                         |            |      |      |         |        |
| Bed size of hospital: small (ref.)                            |                     |                         |            |                     |                         |            |                     |                         |            |                     |                         |            |      |      |         |        |
| Bed size of<br>hospital:<br>medium                            | 0.99                | 0.63                    | 1.57       | .9761               | 1.44                    | 0.61       | 3.3905              | .4037                   | 0.66       | 0.42                | 1.0478                  | .0783      | 0.82 | 0.44 | 1.5292  | .5333  |
| Bed size of<br>hospital:                                      | 0.78                | 0.56                    | 1.0916     | .1484               | 1.34                    | 0.63       | 2.8335              | .4409                   | 1.21       | 0.82                | 1.7768                  | .3314      | 0.9  | 0.52 | 1.5451  | .6999  |

**Supplementary Table V.** (continued)

|                                        | Midwest (n=18200)      |                         |            | Northeast (n=10630)    |                         |            | South (n=36341)        |                         |            | West (n=10815)         |                         |            |                        |                      |            |        |
|----------------------------------------|------------------------|-------------------------|------------|------------------------|-------------------------|------------|------------------------|-------------------------|------------|------------------------|-------------------------|------------|------------------------|----------------------|------------|--------|
|                                        | Lower<br>(95%<br>OR    | Upper<br>(95%<br>CI) OR | P<br>value |                        |                      |            |        |
| large                                  |                        |                         |            |                        |                         |            |                        |                         |            |                        |                         |            |                        |                      |            |        |
| Government, nonfederal (public) (ref.) |                        |                         |            |                        |                         |            |                        |                         |            |                        |                         |            |                        |                      |            |        |
| Private, not-for-profit (voluntary)    | 1.06                   | 0.7                     | 1.5947     | .7864                  | 1.63                    | 0.71       | 3.7623                 | .2497                   | 0.82       | 0.59                   | 1.1593                  | .2658      | 0.46                   | 0.25                 | 0.8565     | .0146  |
| Private, investor-owned (proprietary)  | 0.75                   | 0.45                    | 1.2326     | .2511                  | NA                      | NA         | NA                     | NA                      | 0.67       | 0.45                   | 0.9917                  | .0454      | 0.24                   | 0.12                 | 0.4791     | .0001  |
| Location of hospital: rural (ref.)     |                        |                         |            |                        |                         |            |                        |                         |            |                        |                         |            |                        |                      |            |        |
| Location of hospital: urban            | 0.91                   | 0.61                    | 1.3599     | .6486                  | 1.83                    | 0.55       | 6.073                  | .3208                   | 1.76       | 1.26                   | 2.4438                  | .0008      | 1.6                    | 0.93                 | 2.7621     | .0874  |
| Nonteaching (ref.)                     |                        |                         |            |                        |                         |            |                        |                         |            |                        |                         |            |                        |                      |            |        |
| Teaching                               | 1.54                   | 1.11                    | 2.1307     | .0102                  | 1.79                    | 0.87       | 3.6697                 | .1124                   | 1.64       | 1.2                    | 2.2502                  | .0021      | 1.11                   | 0.68                 | 1.8077     | .6877  |
|                                        | Lower<br>(95%<br>Value | Upper<br>(95%<br>CI)    | P<br>value | Lower<br>(95%<br>Value | Upper<br>(95%<br>CI) | P<br>value |        |
| C-statistics                           | 0.792                  | 0.775                   | 0.808      | <.0001                 | 0.806                   | 0.775      | 0.837                  | <.0001                  | 0.804      | 0.789                  | 0.820                   | <.0001     | 0.815                  | 0.798                | 0.831      | <.0001 |

Notes:

1. Models are typically considered reasonable when the C-statistic is higher than 0.7 and strong when C exceeds 0.8.
2. C-statistics will be likely overoptimistic because they were generated from data fitting the model.

**Supplementary Table VI.** Disposition by top 20th and lowest 20th percentiles for hospital costs

|                                                                                                                                 | Entire HF discharges |        |          |        | Hospital costs ≤20 percentile |        | Hospital costs ≥80 percentile |        |
|---------------------------------------------------------------------------------------------------------------------------------|----------------------|--------|----------|--------|-------------------------------|--------|-------------------------------|--------|
|                                                                                                                                 | Unweighted           |        | Weighted |        | Weighted                      |        | Weighted                      |        |
|                                                                                                                                 | n/mean               | %/SE   | n/mean   | %/SE   | n/mean                        | %/SE   | n/mean                        | %/SE   |
| HF hospital stays                                                                                                               | 189590               | 100.0% | 956745   | 100.0% | 191350                        | 100.0% | 191351                        | 100.0% |
| Discharged to home or self care (routine discharge)                                                                             | 85015                | 50.5%  | 427075   | 50.0%  | 112211                        | 62.5%  | 58821                         | 36.3%  |
| Discharged/transferred to a short-term hospital for inpatient care                                                              | 4497                 | 2.7%   | 23841    | 2.8%   | 5667                          | 3.2%   | 4349                          | 2.7%   |
| Discharged/transferred to a skilled nursing facility with Medicare certification in anticipation of skilled care                | 25611                | 15.2%  | 132265   | 15.5%  | 12612                         | 7.0%   | 36727                         | 22.7%  |
| Discharged/transferred to an intermediate care facility                                                                         | 2530                 | 1.5%   | 12458    | 1.5%   | 2734                          | 1.5%   | 1419                          | 0.9%   |
| Effective 10/1/07: discharged/transferred to a designated cancer center or children's hospital                                  | 169                  | 0.1%   | 858      | 0.1%   | 165                           | 0.1%   | 203                           | 0.1%   |
| Discharged/transferred to home under care of organized home health service organization in anticipation of covered skilled care | 33425                | 19.8%  | 170546   | 20.0%  | 28250                         | 15.7%  | 34938                         | 21.6%  |
| Left against medical advice or discontinued care                                                                                | 1461                 | 0.9%   | 7555     | 0.9%   | 3146                          | 1.8%   | 613                           | 0.4%   |
| Expired                                                                                                                         | 5180                 | 3.1%   | 26708    | 3.1%   | 6229                          | 3.5%   | 9201                          | 5.7%   |
| Court/law enforcement                                                                                                           | 80                   | 0.0%   | 412      | 0.0%   | 62                            | 0.0%   | 106                           | 0.1%   |
| Expired in a medical facility (eg, hospital, skilled nursing facility, intermediate care facility, or free-standing hospice)    | 60                   | 0.0%   | 298      | 0.0%   | 267                           | 0.1%   |                               |        |
| Discharged/transferred to a federal health care facility                                                                        | 125                  | 0.1%   | 614      | 0.1%   | 115                           | 0.1%   | 153                           | 0.1%   |
| Hospice, home                                                                                                                   | 3045                 | 1.8%   | 15237    | 1.8%   | 3270                          | 1.8%   | 3080                          | 1.9%   |
| Hospice, medical facility (certified) providing hospice level of care                                                           | 2465                 | 1.5%   | 12224    | 1.4%   | 2550                          | 1.4%   | 3173                          | 2.0%   |
| Discharged/transferred to a hospital-based medicare approved swing bed                                                          | 945                  | 0.6%   | 5214     | 0.6%   | 394                           | 0.2%   | 903                           | 0.6%   |
| Discharged/transferred to an inpatient rehabilitation facility including rehabilitation distinct part unit of a hospital        | 1968                 | 1.2%   | 10064    | 1.2%   | 642                           | 0.4%   | 4549                          | 2.8%   |
| Discharged/transferred to a medicare certified long-term care hospital                                                          | 1182                 | 0.7%   | 5688     | 0.7%   | 330                           | 0.2%   | 3027                          | 1.9%   |
| Discharged/transferred to a nursing facility certified by Medicaid, but not certified by Medicare                               | 221                  | 0.1%   | 1086     | 0.1%   | 200                           | 0.1%   | 195                           | 0.1%   |
| Discharged/transferred to a psychiatric hospital or psychiatric distinct part unit of a hospital                                | 190                  | 0.1%   | 932      | 0.1%   | 202                           | 0.1%   | 181                           | 0.1%   |
| Discharged/transferred to a critical access hospital                                                                            | 25                   | 0.0%   | 122      | 0.0%   | †                             | †      | †                             | †      |
| Effective 10/1/07: discharged/transferred to another type of institution not defined elsewhere                                  | 264                  | 0.2%   | 1355     | 0.2%   | 435                           | 0.2%   | 213                           | 0.1%   |

Note:

Disposition does not add up to total due to missing data.

† Cannot display due to raw or weighted observation ≤10.

**Supplementary Figure 1**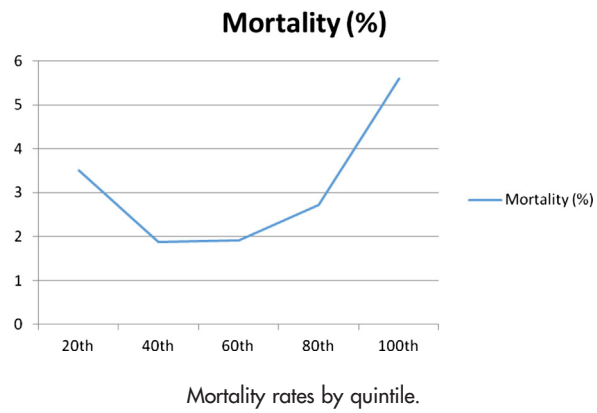

| Quintiles | Mortality (%) |
|-----------|---------------|
| 20th      | 3.51          |
| 40th      | 1.87          |
| 60th      | 1.91          |
| 80th      | 2.72          |
| 100th     | 5.6           |
